# Supplementary material
Source: ML conference proceedings conference paper supplement (https://proceedings.neurips.cc/paper_files/paper/2018/hash/a19744e268754fb0148b017647355b7b-Abstract.html)
Supplement: Supplementary file [file a19744e268754fb0148b017647355b7b-Supplemental.zip]

## A Definition of noise

The definition of transition matrix  $Q$  is as follow.  $n$  is number of the class.

$$\begin{aligned} \text{Pair flipping: } Q &= \begin{bmatrix} 1-\epsilon & \epsilon & 0 & \dots & 0 \\ 0 & 1-\epsilon & \epsilon & & 0 \\ \vdots & & \ddots & \ddots & \vdots \\ 0 & & & 1-\epsilon & \epsilon \\ \epsilon & 0 & \dots & 0 & 1-\epsilon \end{bmatrix}, \\ \text{Symmetry flipping: } Q &= \begin{bmatrix} 1-\epsilon & \frac{\epsilon}{n-1} & \dots & \frac{\epsilon}{n-1} & \frac{\epsilon}{n-1} \\ \frac{\epsilon}{n-1} & 1-\epsilon & \frac{\epsilon}{n-1} & \dots & \frac{\epsilon}{n-1} \\ \vdots & & \ddots & & \vdots \\ \frac{\epsilon}{n-1} & \dots & \frac{\epsilon}{n-1} & 1-\epsilon & \frac{\epsilon}{n-1} \\ \frac{\epsilon}{n-1} & \frac{\epsilon}{n-1} & \dots & \frac{\epsilon}{n-1} & 1-\epsilon \end{bmatrix}. \end{aligned}$$

## B Full Y-axis figures

### B.1 MNIST

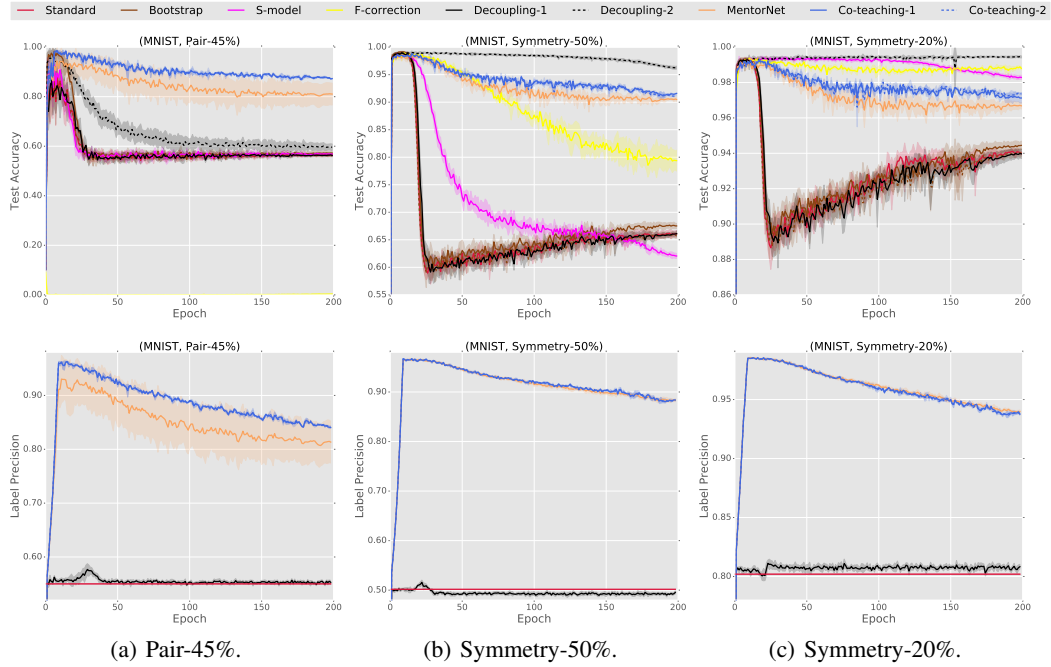

Figure 7: Results on *MNIST* dataset. Top: test accuracy vs. number of epochs; bottom: label precision vs. number of epochs.

## B.2 CIFAR-10

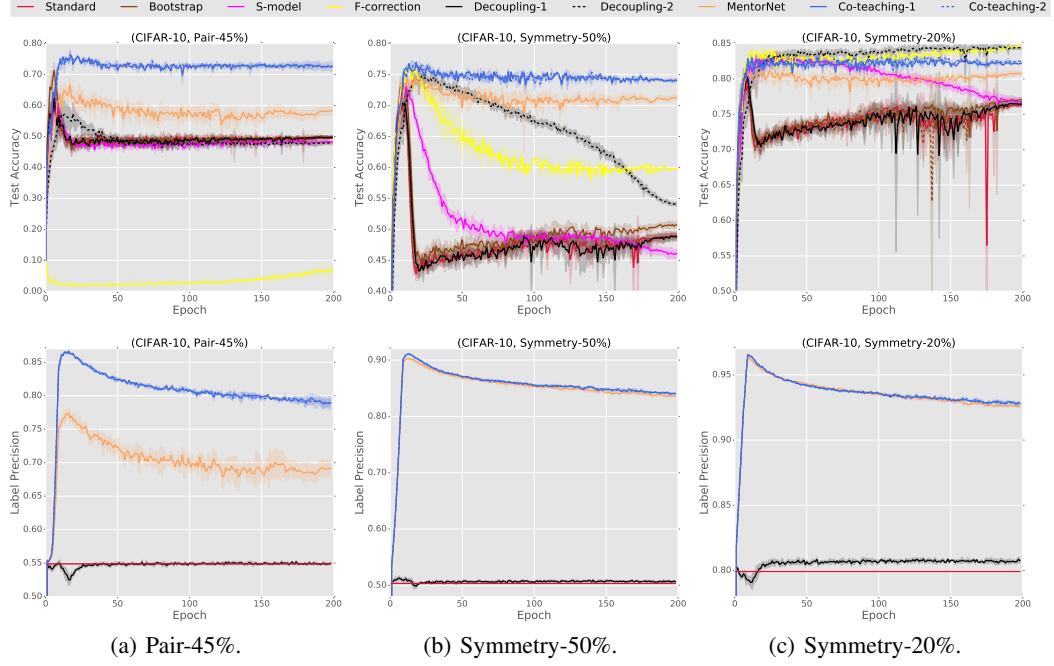

Figure 8: Results on *CIFAR-10* dataset. Top: test accuracy vs. number of epochs; bottom: label precision vs. number of epochs.

## B.3 CIFAR-100

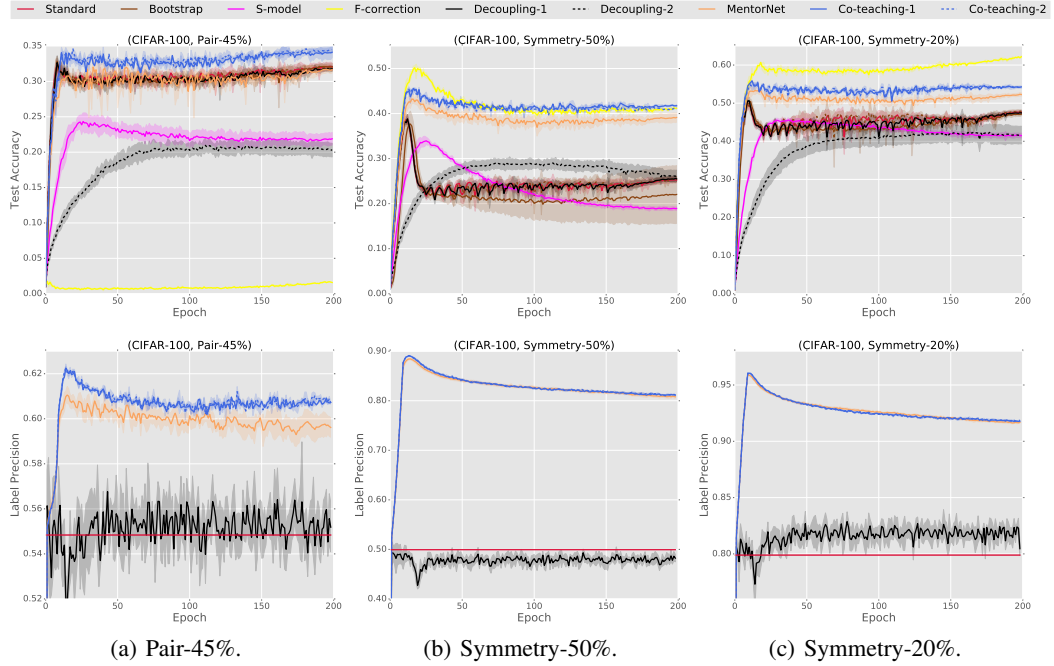

Figure 9: Results on *CIFAR-100* dataset. Top: test accuracy vs. number of epochs; bottom: label precision vs. number of epochs.
